# Supplementary material
Source: MDPI journal article supplement (https://www.mdpi.com/1424-2818/15/3/450)
Supplement: s1 [file s1]

## Supplementary material

**Table S1.** The quality of classification of individuals by species according to the results of LDA.

| Species                 | Classified as:          |                       |                       |                   |                   |                   |                      |                    | Total |
|-------------------------|-------------------------|-----------------------|-----------------------|-------------------|-------------------|-------------------|----------------------|--------------------|-------|
|                         | <i>A. starobogatovi</i> | <i>S. cavernicola</i> | <i>T. kopidophora</i> | <i>C. dadiani</i> | <i>C. lugella</i> | <i>C. shiksha</i> | <i>C. nazodelavo</i> | <i>T. kimmeria</i> |       |
| <i>A. starobogatovi</i> | 36                      | 0                     | 0                     | 0                 | 0                 | 0                 | 1                    | 0                  | 37    |
| <i>S. cavernicola</i>   | 1                       | 13                    | 1                     | 0                 | 4                 | 0                 | 1                    | 0                  | 20    |
| <i>T. kopidophora</i>   | 0                       | 1                     | 30                    | 0                 | 0                 | 0                 | 0                    | 0                  | 31    |
| <i>C. dadiani</i>       | 0                       | 1                     | 0                     | 28                | 0                 | 3                 | 0                    | 0                  | 32    |
| <i>C. lugella</i>       | 1                       | 1                     | 0                     | 0                 | 22                | 1                 | 0                    | 4                  | 29    |
| <i>C. shiksha</i>       | 0                       | 1                     | 0                     | 4                 | 1                 | 41                | 2                    | 2                  | 51    |
| <i>C. nazodelavo</i>    | 0                       | 1                     | 0                     | 0                 | 0                 | 0                 | 8                    | 2                  | 11    |
| <i>T. kimmeria</i>      | 0                       | 0                     | 0                     | 0                 | 2                 | 0                 | 4                    | 19                 | 25    |
| Total                   | 38                      | 18                    | 31                    | 32                | 29                | 45                | 16                   | 27                 | 236   |

**Table S2.** Results of pair-wise PERMANOVA tests. p values are significant levels estimated by permutations of residuals (p < 0.05 are given in bold).

| SPECIES                                           | t    | p            | SPECIES                                        | t    | p            |
|---------------------------------------------------|------|--------------|------------------------------------------------|------|--------------|
| <i>A. starobogatovi</i> vs. <i>S. cavernicola</i> | 4.04 | <b>0.001</b> | <i>T. kopidophora</i> vs. <i>C. dadiani</i>    | 9.51 | <b>0.001</b> |
| <i>A. starobogatovi</i> vs. <i>T. kopidophora</i> | 7.11 | <b>0.001</b> | <i>T. kopidophora</i> vs. <i>C. lugella</i>    | 5.85 | <b>0.001</b> |
| <i>A. starobogatovi</i> vs. <i>T. kimmeria</i>    | 4.15 | <b>0.001</b> | <i>T. kopidophora</i> vs. <i>C. shiksha</i>    | 8.45 | <b>0.001</b> |
| <i>A. starobogatovi</i> vs. <i>C. dadiani</i>     | 6.53 | <b>0.001</b> | <i>T. kopidophora</i> vs. <i>C. nazodelavo</i> | 7.43 | <b>0.001</b> |
| <i>A. starobogatovi</i> vs. <i>C. lugella</i>     | 4.23 | <b>0.001</b> | <i>C. dadiani</i> vs. <i>T. kimmeria</i>       | 4.37 | <b>0.001</b> |
| <i>A. starobogatovi</i> vs. <i>C. shiksha</i>     | 6.79 | <b>0.001</b> | <i>C. dadiani</i> vs. <i>C. lugella</i>        | 5.70 | <b>0.001</b> |
| <i>A. starobogatovi</i> vs. <i>C. nazodelavo</i>  | 2.81 | <b>0.001</b> | <i>C. dadiani</i> vs. <i>C. shiksha</i>        | 2.13 | 0.011        |
| <i>S. cavernicola</i> vs. <i>T. kopidophora</i>   | 3.37 | <b>0.001</b> | <i>C. dadiani</i> vs. <i>C. nazodelavo</i>     | 3.82 | <b>0.001</b> |
| <i>S. cavernicola</i> vs. <i>T. kimmeria</i>      | 4.51 | <b>0.001</b> | <i>C. lugella</i> vs. <i>T. kimmeria</i>       | 2.99 | <b>0.001</b> |
| <i>S. cavernicola</i> vs. <i>C. dadiani</i>       | 5.49 | <b>0.001</b> | <i>C. lugella</i> vs. <i>C. shiksha</i>        | 5.82 | <b>0.001</b> |

|                                                |      |              |                                             |      |              |
|------------------------------------------------|------|--------------|---------------------------------------------|------|--------------|
| <i>S. cavernicola</i> vs. <i>C. lugella</i>    | 2.81 | <b>0.001</b> | <i>C. lugella</i> vs. <i>C. nazodelavo</i>  | 3.50 | <b>0.001</b> |
| <i>S. cavernicola</i> vs. <i>C. shiksha</i>    | 4.70 | <b>0.001</b> | <i>C. shiksha</i> vs. <i>T. kimmeria</i>    | 5.45 | <b>0.001</b> |
| <i>S. cavernicola</i> vs. <i>C. nazodelavo</i> | 4.77 | <b>0.001</b> | <i>C. shiksha</i> vs. <i>C. nazodelavo</i>  | 4.24 | <b>0.001</b> |
| <i>T. kopidophora</i> vs. <i>T. kimmeria</i>   | 7.40 | <b>0.001</b> | <i>C. nazodelavo</i> vs. <i>T. kimmeria</i> | 1.63 | 0.049        |

---
